# Supplementary material
Source: HighWire-hosted journal article supplement (https://bmjopen.bmj.com/content/7/11/e016545)
Supplement: inline-supplementary-material-1 [file inline-supplementary-material-1.pdf]

Supplementary file 1 Category of processes of care

| Category of processes of care | ICPC-2 Code | ICPC-2 label                                         |
|-------------------------------|-------------|------------------------------------------------------|
| DIAGNOSTIC                    | -30         | medical examination / health evaluation complete     |
|                               | -31         | medical examination / health evaluation partial      |
|                               | -32         | sensitivity test                                     |
|                               | -33         | microbiological/immunological test                   |
|                               | -34         | blood test                                           |
|                               | -35         | urine test                                           |
|                               | -36         | faeces test                                          |
|                               | -37         | histological/exfoliative cytology                    |
|                               | -38         | other laboratory test nec                            |
|                               | -39         | physical function test                               |
|                               | -40         | diagnostic endoscopy                                 |
|                               | -41         | diagnostic radiology/imaging                         |
|                               | -42         | electrical tracing                                   |
|                               | -43         | other diagnostic procedure                           |
| PREVENTIVE                    | -44         | preventive immunization/medication                   |
|                               | -45         | observation / health education / advice / diet       |
|                               | -49         | other preventive procedure                           |
| CURATIVE                      | -48         | clarification / discussion of patient's RFE / demand |

|                                                                        |     |                                                                                   |
|------------------------------------------------------------------------|-----|-----------------------------------------------------------------------------------|
|                                                                        | -50 | medication / prescription / renewal / injection                                   |
|                                                                        | -51 | Incision / drainage / flushing / aspiration / removal<br>body fluid               |
|                                                                        | -52 | excision / removal tissue / biopsy / destruction /<br>debridement / cauterization |
|                                                                        | -53 | instrumentation / catheterization / intubation / dilation                         |
|                                                                        | -54 | repair / fixation-suture / cast / prosthetic device                               |
|                                                                        | -55 | local injection / infiltration                                                    |
|                                                                        | -56 | dressing / pressure / compression / tamponade                                     |
|                                                                        | -57 | physical medicine / rehabilitation                                                |
|                                                                        | -58 | therapeutic counselling / listening                                               |
|                                                                        | -59 | other therapeutic procedure / minor surgery nec                                   |
| ADMINISTRATIVE                                                         | -62 | administrative procedure                                                          |
| COORDINATION                                                           | -46 | consultation with primary care provider                                           |
|                                                                        | -47 | consultation with specialist                                                      |
|                                                                        | -66 | referral to other provider / nurse / therapist / social<br>worker                 |
|                                                                        | -67 | referral to physician / specialist / clinic / hospital                            |
|                                                                        | -68 | other referral nec                                                                |
| OTHER Suppressed<br>as only reasons for encounter and<br>not processes | -60 | result test / procedure                                                           |
|                                                                        | -61 | result examination / test / record / letter from other<br>provider                |
|                                                                        | -63 | follow-up encounter unspecified                                                   |
|                                                                        | -64 | encounter / problem initiated by provider                                         |

- 65 encounter / problem initiated by other than patient / provider
  - 69 other reason for encounter nec
-
